# Supplementary material for: Targeted Primary and Secondary Preventive Strategies for Depression among Malaysian Pharmacy Students
Source: MDPI journal article supplement (doi:10.3390/ijerph19159629), 2022-08-05
Supplement: s1 [file s1]

Supplementary Table S1. Summary of Sociodemographic, Psychosocial and Academic Variables for Association Study

| Domain / variables                                  | Measure / data item                                    |
|-----------------------------------------------------|--------------------------------------------------------|
| Sociodemographic                                    |                                                        |
| Age                                                 | Years                                                  |
| Gender                                              | Female / Male                                          |
| Ethnicity                                           | Malay / Chinese / Indian / Others                      |
| Religion                                            | Islam / Buddha / Hindu / Christian / Others            |
| Nicotine smoking                                    | Yes / No                                               |
| Current place of residence                          | Home / Hostel / Rental house / Others                  |
| Marital status                                      | Yes / No                                               |
| Year of study                                       | Year 1 / Year 2 / Year 3 / Year 4                      |
| Study institution                                   | Public / Private                                       |
| Family monthly income*                              | USD 482 – < USD 1204 / USD 1204 – USD 1927 / >USD 1927 |
| Psychosocial                                        |                                                        |
| Alcohol consumption                                 | Yes / No                                               |
| Recreational drug usage                             | Regular user / No                                      |
| Parental marital status                             | Still together / Separated, Divorced                   |
| Recent loss of someone close within the past 1 year | Yes / No                                               |
| Academic Matters                                    |                                                        |
| Academic degree as first choice to study            | Yes / No                                               |
| Scholarship                                         | Yes / No                                               |
| CGPA                                                | 2.00 – 2.99 / 3.00 – 3.49 / 3.50 – 4.00                |
| Other Matters                                       |                                                        |
| Family history of mental illness                    | Yes / No                                               |
| Comorbidities                                       | Yes / No                                               |

\*1 USD = RM4.15

Supplementary Table S2. Sociodemographic, Psychosocial and Academic Profiles of Pharmacy Students based on Depression Symptoms (n = 610)

| Profiles                     |                                    | Depression Symptoms |             | X <sup>2</sup> -<br>statistics<br>(df) | p value           |
|------------------------------|------------------------------------|---------------------|-------------|----------------------------------------|-------------------|
|                              |                                    | No                  | Yes         |                                        |                   |
| Sociodemographic             |                                    |                     |             |                                        |                   |
| Age                          | < 20 years old                     | 50 (64.1%)          | 28 (35.9%)  | 5.02 (1)                               | 0.08 <sup>a</sup> |
|                              | 20 – 24 years old                  | 262 (51.2%)         | 250 (48.8%) |                                        |                   |
|                              | 25 – 29 years old                  | 9 (45.0%)           | 11 (55.0%)  |                                        |                   |
| Gender                       | Male                               | 56 (57.1%)          | 42 (42.9%)  | 0.96 (1)                               | 0.33 <sup>a</sup> |
|                              | Female                             | 265 (51.8%)         | 247 (48.2%) |                                        |                   |
| Ethnicity                    | Malay                              | 257 (51.4%)         | 243 (48.6%) | 1.66 (1)                               | 0.20 <sup>a</sup> |
|                              | Non-Malay                          | 64 (58.2%)          | 46 (41.8%)  |                                        |                   |
| Religion                     | Muslim                             | 261 (51.1%)         | 250 (48.9%) | 3.02 (1)                               | 0.08 <sup>a</sup> |
|                              | Non-Muslim                         | 60 (60.6%)          | 39 (39.4%)  |                                        |                   |
| Nicotine smoking             | Yes                                | 1 (12.5%)           | 7 (87.5%)   | -                                      | 0.03 <sup>b</sup> |
|                              | No                                 | 320 (53.2%)         | 282 (46.8%) |                                        |                   |
| Place of residence           | Hostel                             | 173 (54.4%)         | 145 (45.6%) | 0.84 (1)                               | 0.36 <sup>a</sup> |
|                              | Non-hostel                         | 148 (50.7%)         | 144 (49.3%) |                                        |                   |
| Marital status               | Single                             | 305 (53.3%)         | 267 (46.7%) | 1.80 (1)                               | 0.18 <sup>a</sup> |
|                              | Non-single                         | 16 (42.1%)          | 22 (57.9%)  |                                        |                   |
| Year of study                | Year 1                             | 76 (59.8%)          | 51 (40.2%)  | 3.52 (1)                               | 0.32 <sup>a</sup> |
|                              | Year 2                             | 75 (50.3%)          | 74 (49.7%)  |                                        |                   |
|                              | Year 3                             | 71 (49.7%)          | 72 (50.3%)  |                                        |                   |
|                              | Year 4                             | 99 (51.8%)          | 92 (48.2%)  |                                        |                   |
| Institution                  | Public                             | 195 (53.1%)         | 172 (46.9%) | 0.09 (1)                               | 0.80 <sup>a</sup> |
|                              | Private                            | 126 (51.9%)         | 117 (48.1%) |                                        |                   |
| Family monthly income*       | < USD1204                          | 157 (50.0%)         | 157 (50.0%) | 1.79 (1)                               | 0.18 <sup>a</sup> |
|                              | > USD1204                          | 164 (55.4%)         | 132 (44.6%) |                                        |                   |
| Psychosocial                 |                                    |                     |             |                                        |                   |
| Alcohol consumption          | Yes                                | 17 (43.6%)          | 22 (56.4%)  | 1.36 (1)                               | 0.24 <sup>a</sup> |
|                              | No                                 | 304 (53.2%)         | 267 (46.8%) |                                        |                   |
| Recreational drug usage      | Yes                                | 1 (16.7%)           | 5 (83.3%)   | -                                      | 0.11 <sup>b</sup> |
|                              | No                                 | 320 (53.0%)         | 284 (47.0%) |                                        |                   |
| Parental marital status      | Still together                     | 292 (54.5%)         | 244 (45.5%) | 6.09 (1)                               | 0.01 <sup>a</sup> |
|                              | Separated/<br>divorced/<br>widowed | 29 (39.2%)          | 45 (60.8%)  |                                        |                   |
| Recent loss of someone close | Yes                                | 72 (45.0%)          | 88 (55.0%)  | 5.05 (1)                               | 0.03 <sup>a</sup> |
|                              | No                                 | 249 (55.3%)         | 201 (44.7%) |                                        |                   |

|                                          |             |             |             |          |                    |
|------------------------------------------|-------------|-------------|-------------|----------|--------------------|
| within the past 1 year                   |             |             |             |          |                    |
| Academic matters                         |             |             |             |          |                    |
| Pharmacy degree as first choice to study | Yes         | 217 (56.4%) | 168 (43.6%) | 5.85 (1) | 0.02 <sup>a</sup>  |
|                                          | No          | 104 (46.2%) | 121 (53.8%) |          |                    |
| Scholarship                              | Yes         | 90 (51.7%)  | 84 (48.3%)  | 0.08 (1) | 0.78 <sup>a</sup>  |
|                                          | No          | 231 (53.0%) | 205 (47.0%) |          |                    |
| cGPA                                     | 2.00 – 2.99 | 40 (42.1%)  | 55 (57.9%)  | 8.87 (1) | 0.01 <sup>a</sup>  |
|                                          | 3.00 – 3.49 | 156 (51.0%) | 150 (49.0%) |          |                    |
|                                          | 3.50 – 4.00 | 125 (59.8%) | 84 (40.2%)  |          |                    |
| Other matters                            |             |             |             |          |                    |
| Family history of mental illness         | Yes         | 21 (36.8%)  | 36 (63.2%)  | 6.28 (1) | 0.01 <sup>a</sup>  |
|                                          | No          | 300 (54.2%) | 253 (45.8%) |          |                    |
| Comorbidities                            | Yes         | 61 (41.8%)  | 85 (58.2%)  | 9.05 (1) | 0.003 <sup>a</sup> |
|                                          | No          | 260 (56.0%) | 204 (44.0%) |          |                    |

<sup>a</sup> Pearson's Chi square test

<sup>b</sup> Fisher's Exact test

\*1 USD = RM4.15

Supplementary Table S3. Differences in mean depression scores based on DASS-42 between groups (n=610)

| Profiles                       |                                     | Mean Depression Score (±SD) | Mean difference (95% CI) | t-statistics (df) / F-statistics (df1,df2) | p-value            |
|--------------------------------|-------------------------------------|-----------------------------|--------------------------|--------------------------------------------|--------------------|
| <b><i>Sociodemographic</i></b> |                                     |                             |                          |                                            |                    |
| <b>Age</b>                     | 18 – 20 years old (n=78)            | 8.58 (±7.52)                | -                        | 3.05 (2, 607)                              | 0.05 <sup>b</sup>  |
|                                | 20 – 24 years old (n=512)           | 11.20 (±9.39)               |                          |                                            |                    |
|                                | 25 – 29 years old (n=20)            | 12.50 (±10.18)              |                          |                                            |                    |
| <b>Gender</b>                  | Male (n=98)                         | 10.37 (±9.46)               | 0.64 (-1.3 – 2.6)        | -0.62 (608)                                | 0.54 <sup>a</sup>  |
|                                | Female (n=512)                      | 11.01 (±9.19)               |                          |                                            |                    |
| <b>Ethnicity</b>               | Malay (n=500)                       | 11.22 (±9.30)               | -                        | 4.76 (3, 606)                              | 0.003 <sup>b</sup> |
|                                | Chinese (n=61)                      | 6.92 (±6.70)                |                          |                                            |                    |
|                                | Indian (n=36)                       | 12.19 (±10.74)              |                          |                                            |                    |
|                                | Others (n=13)                       | 13.92 (±8.27)               |                          |                                            |                    |
| <b>Religion</b>                | Islam (n=511)                       | 11.26 (±9.27)               | -                        | 4.24 (4, 605)                              | 0.001 <sup>b</sup> |
|                                | Buddha (n=48)                       | 6.75 (±6.82)                |                          |                                            |                    |
|                                | Hindu (n=29)                        | 10.84 (±10.84)              |                          |                                            |                    |
|                                | Christian (n=14)                    | 5.93 (±5.51)                |                          |                                            |                    |
|                                | Others (n=8)                        | 15.63 (±9.94)               |                          |                                            |                    |
| <b>Nicotine smoking</b>        | Yes (n=8)                           | 18.50 (±10.24)              | 7.7 (1.3 – 14.1)         | 2.35 (608)                                 | 0.02 <sup>a</sup>  |
|                                | No (n=602)                          | 10.80 (±9.18)               |                          |                                            |                    |
| <b>Place of residence</b>      | Home (n=152)                        | 11.28 (±8.80)               | -                        | 1.34 (3, 606)                              | 0.26 <sup>b</sup>  |
|                                | Hostel (n=318)                      | 10.24 (±8.64)               |                          |                                            |                    |
|                                | Rental house outside campus (n=139) | 11.99 (±10.83)              |                          |                                            |                    |
|                                | Others (n=1)                        | 15.00 (±0.00)               |                          |                                            |                    |
| <b>Marital status</b>          | Single (n=572)                      | 10.83 (±9.25)               | -                        | 0.65 (3, 606)                              | 0.58 <sup>b</sup>  |
|                                | Married (n=2)                       | 10.50 (±9.20)               |                          |                                            |                    |
|                                | Divorced (n=1)                      | 2.00 (±0.00)                |                          |                                            |                    |
|                                | In a serious relationship (n=35)    | 12.46 (±9.10)               |                          |                                            |                    |
| <b>Year of study</b>           | Year 1 (n=127)                      | 9.54 (±8.36)                | -                        | 1.24 (3, 606)                              | 0.30 <sup>b</sup>  |
|                                | Year 2 (n=149)                      | 11.36 (±9.45)               |                          |                                            |                    |
|                                | Year 3 (n=143)                      | 11.48 (±8.70)               |                          |                                            |                    |
|                                | Year 4 (n=191)                      | 11.03 (±9.95)               |                          |                                            |                    |
| <b>Institution</b>             | Public (n=367)                      | 10.51 (±8.64)               | 0.99 (-0.5 – 2.5)        | -1.29 (608)                                | 0.21 <sup>a</sup>  |
|                                | Private (n=243)                     | 11.50 (±10.05)              |                          |                                            |                    |
| <b>Family income*</b>          | USD 482 – USD 1204 (n=314)          | 11.22 (±8.97)               | 1.66                     | 2.30 (608)                                 | 0.02 <sup>a</sup>  |

|                                                     |                                     |                |                      |                  |                     |
|-----------------------------------------------------|-------------------------------------|----------------|----------------------|------------------|---------------------|
|                                                     | USD 1204 – USD 1927<br>(n=296)      | 9.56 (±8.82)   | (0.2 – 3.1)          |                  |                     |
| <i>Psychosocial</i>                                 |                                     |                |                      |                  |                     |
| Alcohol consumption                                 | Yes (n=39)                          | 11.26 (±8.83)  | 0.38<br>(-2.6 – 3.4) | 0.25 (608)       | 0.80 <sup>a</sup>   |
|                                                     | No (n=571)                          | 10.88 (±9.27)  |                      |                  |                     |
| Recreational drug use                               | Regular user (n=6)                  | 20.50 (±14.85) | 9.67<br>(2.2 – 17.1) | 2.55 (608)       | 0.01 <sup>a</sup>   |
|                                                     | No (n=604)                          | 10.83 (±9.17)  |                      |                  |                     |
| Parental marital status                             | Still together (n=536)              | 10.53 (±8.98)  | 3.11<br>(0.9 – 5.3)  | -2.73 (608)      | 0.02 <sup>a</sup>   |
|                                                     | Separated/ divorced/ Widowed (n=74) | 13.64 (±10.53) |                      |                  |                     |
| Recent loss of someone close within the past 1 year | Yes (n=160)                         | 12.53 (±9.68)  | 2.20<br>(0.5 – 3.9)  | 2.60 (608)       | <0.01 <sup>a</sup>  |
|                                                     | No (n=450)                          | 10.33 (±9.01)  |                      |                  |                     |
| <i>Academic matters</i>                             |                                     |                |                      |                  |                     |
| Pharmacy degree as students' first choice to study  | Yes (n=385)                         | 9.90 (±8.39)   | 2.72<br>(0.7 – 4.6)  | -3.54 (608)      | <0.001 <sup>a</sup> |
|                                                     | No (n=225)                          | 12.62 (±10.31) |                      |                  |                     |
| Scholarship                                         | Yes (n=174)                         | 10.60 (±9.00)  | 0.43<br>(-1.2 – 2.1) | -0.52 (608)      | 0.60 <sup>a</sup>   |
|                                                     | No (436)                            | 11.03 (±9.33)  |                      |                  |                     |
| cGPA                                                | 2.00 – 2.99 (n=95)                  | 13.58 (±10.28) | -                    | 8.19<br>(2, 607) | <0.001 <sup>b</sup> |
|                                                     | 3.00 – 3.49 (n=306)                 | 11.27 (±9.49)  |                      |                  |                     |
|                                                     | 3.50 – 4.00 (n=209)                 | 9.15 (±7.95)   |                      |                  |                     |
| <i>Other matters</i>                                |                                     |                |                      |                  |                     |
| Family history of mental illness                    | Yes (n=57)                          | 15.33 (±10.45) | 4.88<br>(2.4 – 7.4)  | 3.84 (608)       | <0.001 <sup>a</sup> |
|                                                     | No (n=553)                          | 10.45 (±8.98)  |                      |                  |                     |
| Comorbidity                                         | Yes (n=146)                         | 10.16 (±8.88)  | 3.1<br>(1.3 – 4.9)   | -3.37 (608)      | <0.001 <sup>a</sup> |
|                                                     | No (n=464)                          | 13.26 (±9.94)  |                      |                  |                     |

<sup>a</sup> Independent T-test

<sup>b</sup> One-way ANOVA with post hoc analysis

\*1 USD = RM4.15
